# Supplementary material for: Vesicular disruption of lysosomal targeting organometallic polyarginine bioconjugates
Source: Royal Society of Chemistry journal article supplement (doi:10.1039/c4mt00255e), 2015-01-01
Supplement: c4mt00255e1.pdf [file c4mt00255e1.pdf]

Electronic Supplementary Information for Manuscript MT-ART-09-2014-000255

## **Supporting Information**

### **Vesicular Disruption of Lysosomal Targeting Organometallic Polyarginine Bioconjugates**

Annika Gross<sup>a, d, \*</sup>, Hamed Alborzinia<sup>b</sup>, Stefania Piantavigna<sup>c</sup>, Lisandra L. Martin<sup>c</sup>, Stefan Wölfl<sup>b</sup> and Nils Metzler-Nolte<sup>a</sup>

<sup>a</sup>: *Department of Chemistry and Biochemistry*

*University of Bochum, Universitätsstrasse 150, D-44801 Bochum (Germany)*

*Fax: +49 (0)234 - 32 14378*

*E-Mail: nils.metzler-nolte@ruhr-uni-bochum.de*

<sup>b</sup>: *Institute of Pharmacy and Molecular Biotechnology, Ruprecht-Karls-Universität*

*Heidelberg, Im Neuenheimer Feld 364, D-69120 Heidelberg, Germany*

<sup>c</sup>: *School of Chemistry, Monash University, Clayton, Victoria, Australia*

<sup>d</sup>: *Current Address: Institute of Pharmacy, Technische Universität Braunschweig*

*Beethovenstr. 55, D-38106 Braunschweig, Germany*

#### **Table of Content**

I. HPLC characterization of **1**, **2**, **3** and **5**

II. Membrane Studies

III. Biological Studies

- a) Uptake Studies of **4**, **5** and **6**
- b) Cytotoxicity Assays
- c) Apoptosis Assay
- d) Cell Cycle Studies

IV. Abbreviations

## I. HPLC characterization of 1, 2, 3 and 5

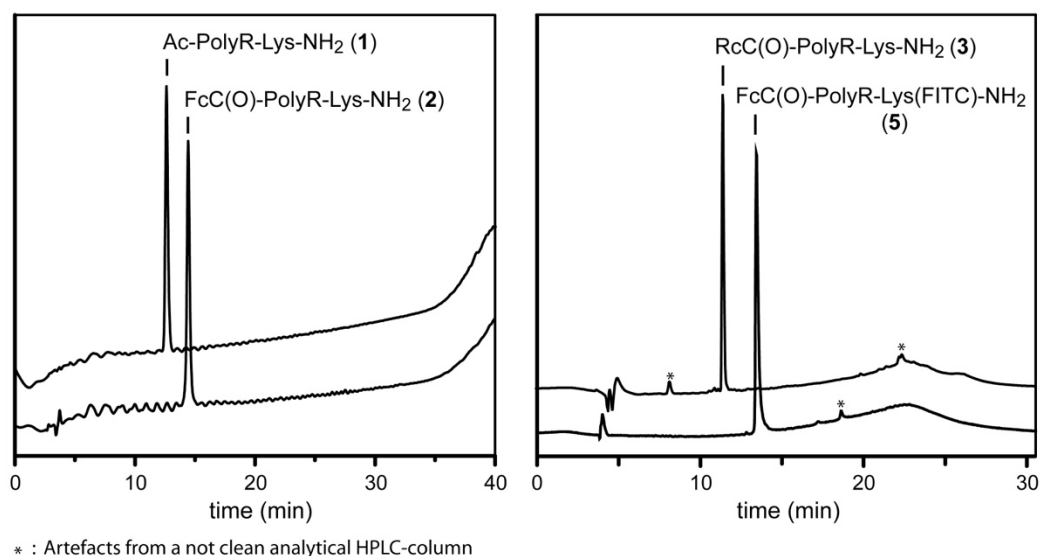

**Figure S1.** HPLC-chromatogram of the purified compounds **1** and **2** detected at 220 nm, run: 40 min (left); HPLC-chromatogram of the purified compounds **3** and **5** detected at 254 nm (right).

## II. Membrane Studies

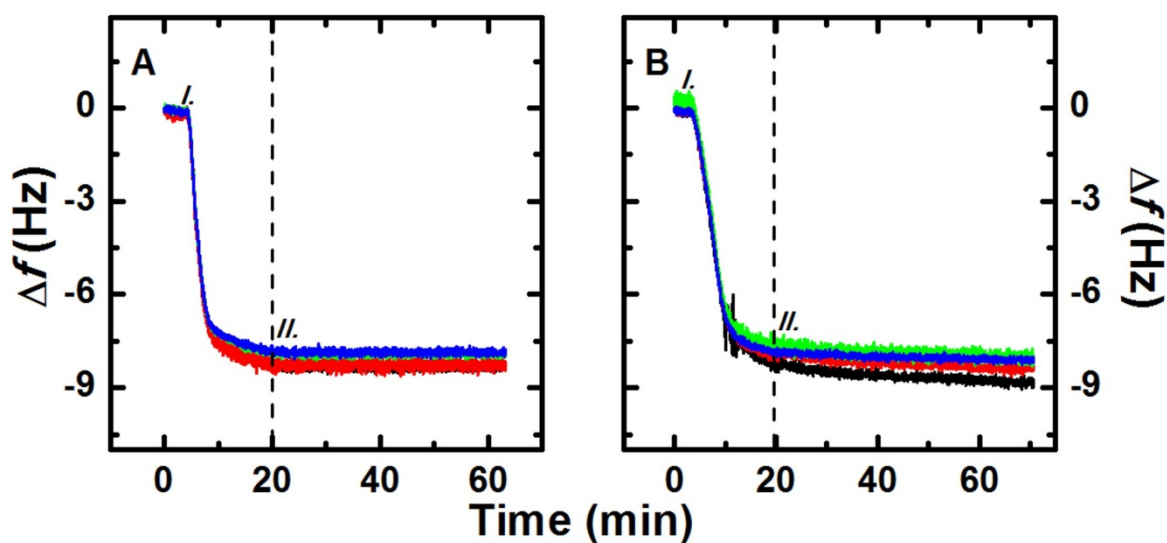

**Figure S2:**  $\Delta f$ -t plots obtained for peptide **1** (A) and peptide **3** (B) interacting with a DMPC/Cholesterol membrane. The plots are for 5  $\mu$ M. The harmonics represented are: 3<sup>rd</sup> (black line), 5<sup>th</sup> (red line), 7<sup>th</sup> (green line) and 9<sup>th</sup> (blue line). The vertical dash line indicates the time when the peptide flow stopped (II.), while I. corresponds to the beginning of the peptide injection into the QCM chamber.

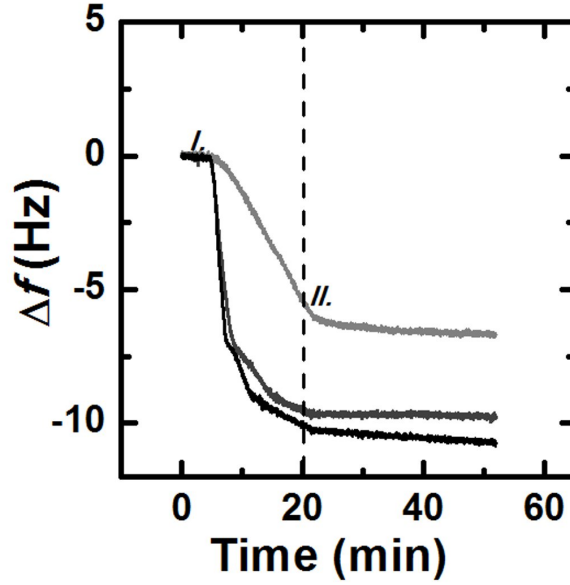

**Figure S3:**  $\Delta f$ -t plots obtained for peptide 2 interacting with a DMPC/Cholesterol membrane. The concentrations used are 1, 5 and 10  $\mu\text{M}$  (from the lightest to the darkest trace). The harmonic examined was the 7<sup>th</sup>. The vertical dash line indicates the time when the peptide flow stopped (II.), while I. corresponds to the beginning of the peptide injection into the QCM chamber.

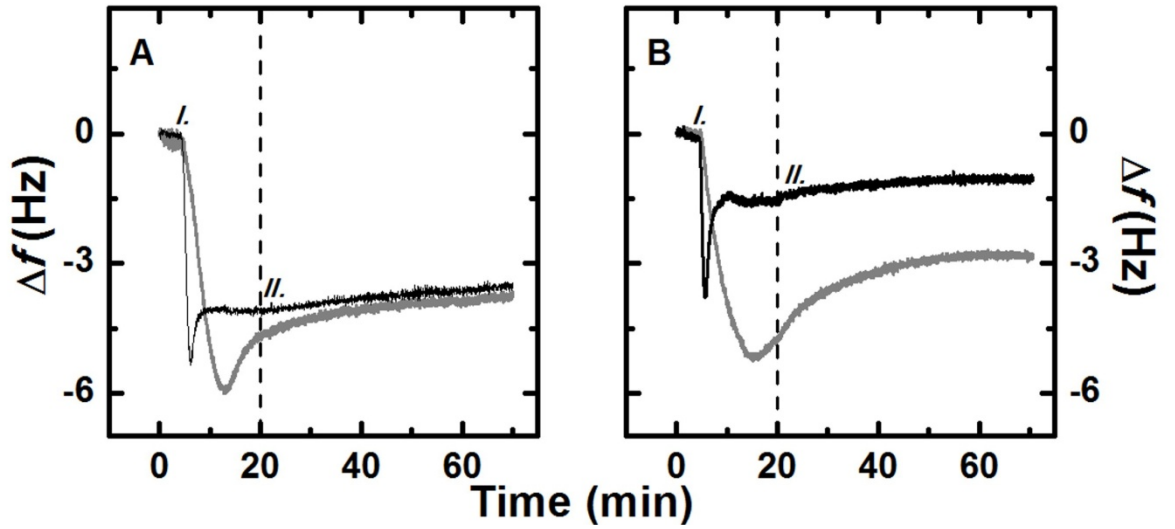

**Figure S4:**  $\Delta f$ -t plots obtained for peptide 1 (A) and peptide 3 (B) interacting with a DMPC/DMPG membrane. The concentrations used are 1  $\mu\text{M}$  (light grey) and 10  $\mu\text{M}$  (black trace). The harmonic examined was the 7<sup>th</sup>. The vertical dash line indicates the time when the peptide flow stopped (II.), while I. corresponds to the beginning of the peptide injection into the QCM chamber.

### III. Biological Studies

#### a) Uptake Studies of 4, 5 and 6

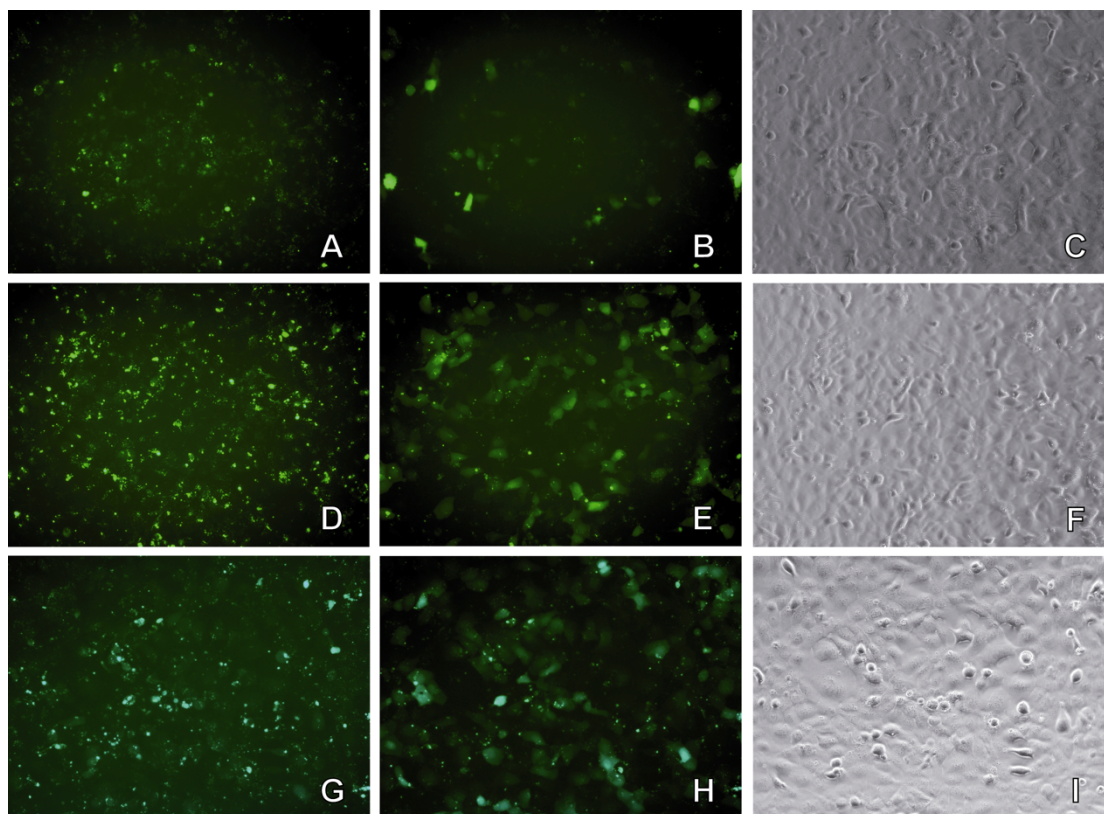

**Figure S5.** Cellular uptake of **4** (10  $\mu$ M) in PT45 cells after 14 h incubation. A: fluorescence image,  $t = 0$ ; B: fluorescence image,  $t = 5$  min; C: phase contrast. FITC-filter, 200x magnification. Cellular uptake of **5** (10  $\mu$ M) in PT45 cells after 14 h incubation. D: fluorescence image,  $t = 0$ ; E: fluorescence image,  $t = 5$  min; F: phase contrast. FITC-Filter, 200x magnification. Cellular uptake of **6** (10  $\mu$ M) in PT45 cells after 14 h incubation. G: fluorescence image,  $t = 0$ ; H: fluorescence image,  $t = 5$  min; I: phase contrast. FITC-Filter, 200x magnification.

#### b) Cytotoxicity Assays

##### **Cytotoxicity assays:**

**Resazurin Assay.** 1 mL of resazurin solution per plate was diluted with 9 mL medium without phenol red. 100  $\mu$ L of this solution was added per well and their absorbance was measured using a Tecan plate reader at 600 nm, using a reference wavelength of 690 nm. The plates were incubated for 2 h at 37  $^{\circ}$ C and 10% CO<sub>2</sub> and were measured again.

**Crystal Violet Assay.** To perform the crystal violet assay, the resazurin solution was removed and the cells were fixed using 0.2% glutardialdehyde for 25 min. The glutardialdehyde solution was removed and exchanged for 100  $\mu$ L of 0.1% triton solution. After a short incubation, all liquids were removed and the fixed cells were stained with a 0.02 M crystal violet solution for 30 min. Afterwards the wells were washed intensely with H<sub>2</sub>O and were filled with 100  $\mu$ L of 96% ethanol, followed by shaking on a softly rocking rotary shaker for 3 h. The absorption of the ethanolic solution was measured using a micro-plate reader at 570 nm.

**Table S1.** IC<sub>50</sub> values, resazurin assay after 48 h incubation.

| Compound              | HeLa          | PT45          | HepG2         |
|-----------------------|---------------|---------------|---------------|
|                       | [ $\mu$ M]    | [ $\mu$ M]    | [ $\mu$ M]    |
| <b>1</b>              | 251 $\pm$ 19  | 290 $\pm$ 10  | 307 $\pm$ 38  |
| <b>2</b>              | 62 $\pm$ 3    | 133 $\pm$ 18  | 86 $\pm$ 13   |
| <b>3</b>              | 134 $\pm$ 15  | 215 $\pm$ 9   | 195 $\pm$ 17  |
| FcC(O)OH,<br>RcC(O)OH | > 1000        | > 1000        | > 1000        |
| cisplatin             | 1.8 $\pm$ 0.1 | 2.3 $\pm$ 0.1 | 2.1 $\pm$ 0.1 |

c) Apoptosis Assay

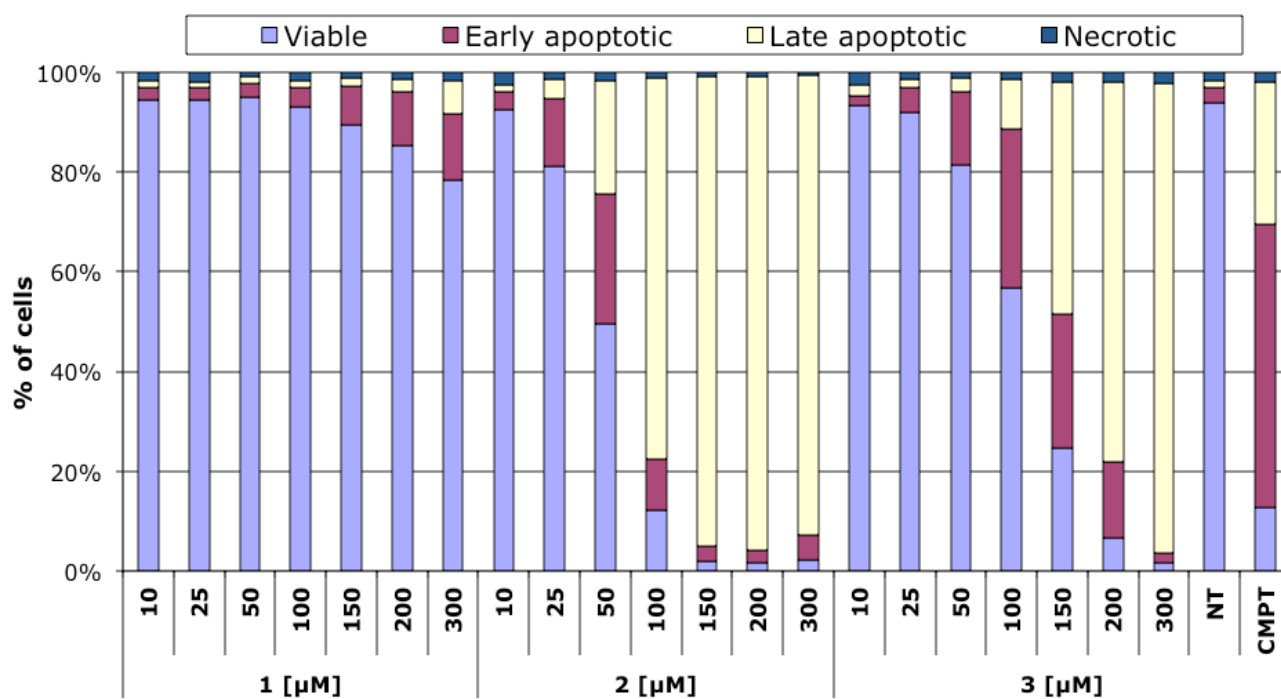

**Figure S6.** Apoptosis induction in HeLa cells in % of cells by **1**, **2** and **3** at the indicated concentrations after 48 h incubation.

#### d) Cell Cycle Studies

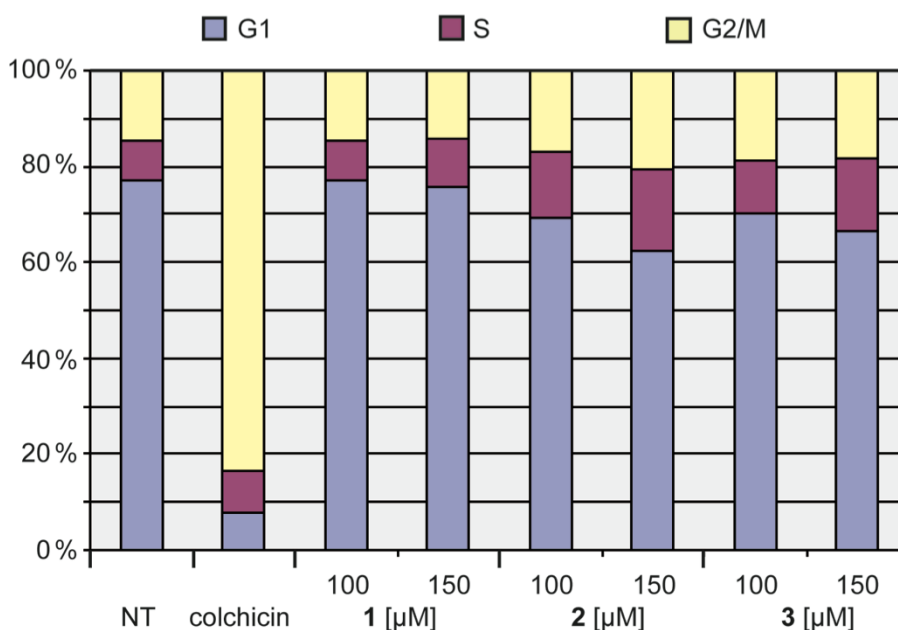

**Figure S7.** Cell cycle studies of **1**, **2** and **3** in HeLa cells at indicated concentrations after 24 h incubation.

#### IV. *Abbreviations*

AAS, atomic absorption spectrometry; AnnV, Annexin V; ATP, adenosine triphosphate; BSA, bovine serum albumin; Cp, cyclopentadiene; CPP, cell-penetrating peptide; DCM, dichloromethane; DIPEA, N,N-diisopropylethylamine; DMF, dimethylformamide; DMPC, 1,2-dimyristoyl-*sn*-glycero-3-phosphocholine; DMPG, 1,2-dimyristoyl-*sn*-glycero-3-phosphoglycerol; DMSO, dimethyl sulfoxide; ESI, electrospray ionization; FITC, fluorescein isothiocyanate; Fmoc, 9-fluorenylmethyloxycarbonyl; HeLa, immortal cell line (cervical cancer cells); HepG2, immortal cell line (hepatocellular carcinoma); HOBt, N-hydroxybenzotriazole·H<sub>2</sub>O; HT-29, immortal cell line (colon carcinoma); IMIM-PC2, immortal cell line (ductal pancreas carcinoma); LMP, lysosomal membrane permeabilization; MALDI-TOF, matrix-assisted laser desorption/ionization-time-of-flight; MeCN, acetonitrile; MeOH, methanol; Mtt, 4-methyltrityl; NT, non treated cells; Pbf, 2,2,4,6,7-pentamethyldihydrobenzofurane-5-sulfonyl; PBS, phosphate buffered saline; Pen Strep, penicillin streptomycin solution; PI, propidium iodide; PNA, peptide nucleic acids; PT45, immortal cell line (pancreatic carcinoma cells); ROS, reactive oxygen species; SPPS, solid-phase peptide synthesis; RT, room temperature; TBTU, 2-(1H-benzotriazole-1-yl)-1,1,3,3-tetramethyluronium tetrafluoroborate; TFA, trifluoroacetic acid; TIS, triisopropylsilane.
